# Supplementary material
Source: Elsevier journal article supplement (https://www.sciencedirect.com/science/article/pii/S2531043721000908)
Supplement: mmc1 [file S2531043721000908:mmc1.docx]

**Reply to the Editor:**

1. The discussion must precede the description of the case, focusing with detailed description of the image

*I made the change in the text itself.*

2. You need high quality (better than that) images and if you have you can add another one

*I improved the image quality as suggested.*

*I have also included a computed tomography image where the skin changes are visible, in soft tissues window.*

3. Revise English with a mother tongue reviewer

*I revised the text with a mother tongue reviewer.*

4. Revise reference style according to the journal rules (names abbreviated, etc)

*I corrected bibliography according to the publication rules of the journal Pulmonology.*

5. No abstract, no headings

6. precede title by "Images"

*I removed the abstract and did the changes in the main text.*

*If there is anything else that we can improve in order to make the article more suitable for your journal, please let us know so that we can meet your expectations.*
